# Supplementary material for: Regulation of the nature and sites of copper species in CuNaY zeolites for ethylene and ethane separation
Source: Royal Society of Chemistry journal article supplement (doi:10.1039/d3nj00168g), 2023-01-01
Supplement: d3nj00168g1.pdf [file d3nj00168g1.pdf]

## Supporting Information

### Regulation of the nature and site of copper species in CuNaY zeolites for the ethylene and ethane separation

Guanhong Li,<sup>a, †</sup> Huan Wang,<sup>b, †</sup> Qiang Li,<sup>a</sup> Xiaoxin Zhang,<sup>a</sup> Yucai Qin,<sup>\*a</sup> Yanfeng Bi,  
<sup>a</sup> and Lijuan Song,<sup>\*a b</sup>

<sup>a</sup>School of Petrochemical Engineering, Liaoning Petrochemical University, Fushun

Liaoning 113001, China; E-mail: qinyucai@lnpu.edu.cn,

<sup>b</sup>School of Chemical Engineering, China University of Petroleum, Qingdao

Shandong 266000, China;

<sup>†</sup>. These authors contributed equally to this work

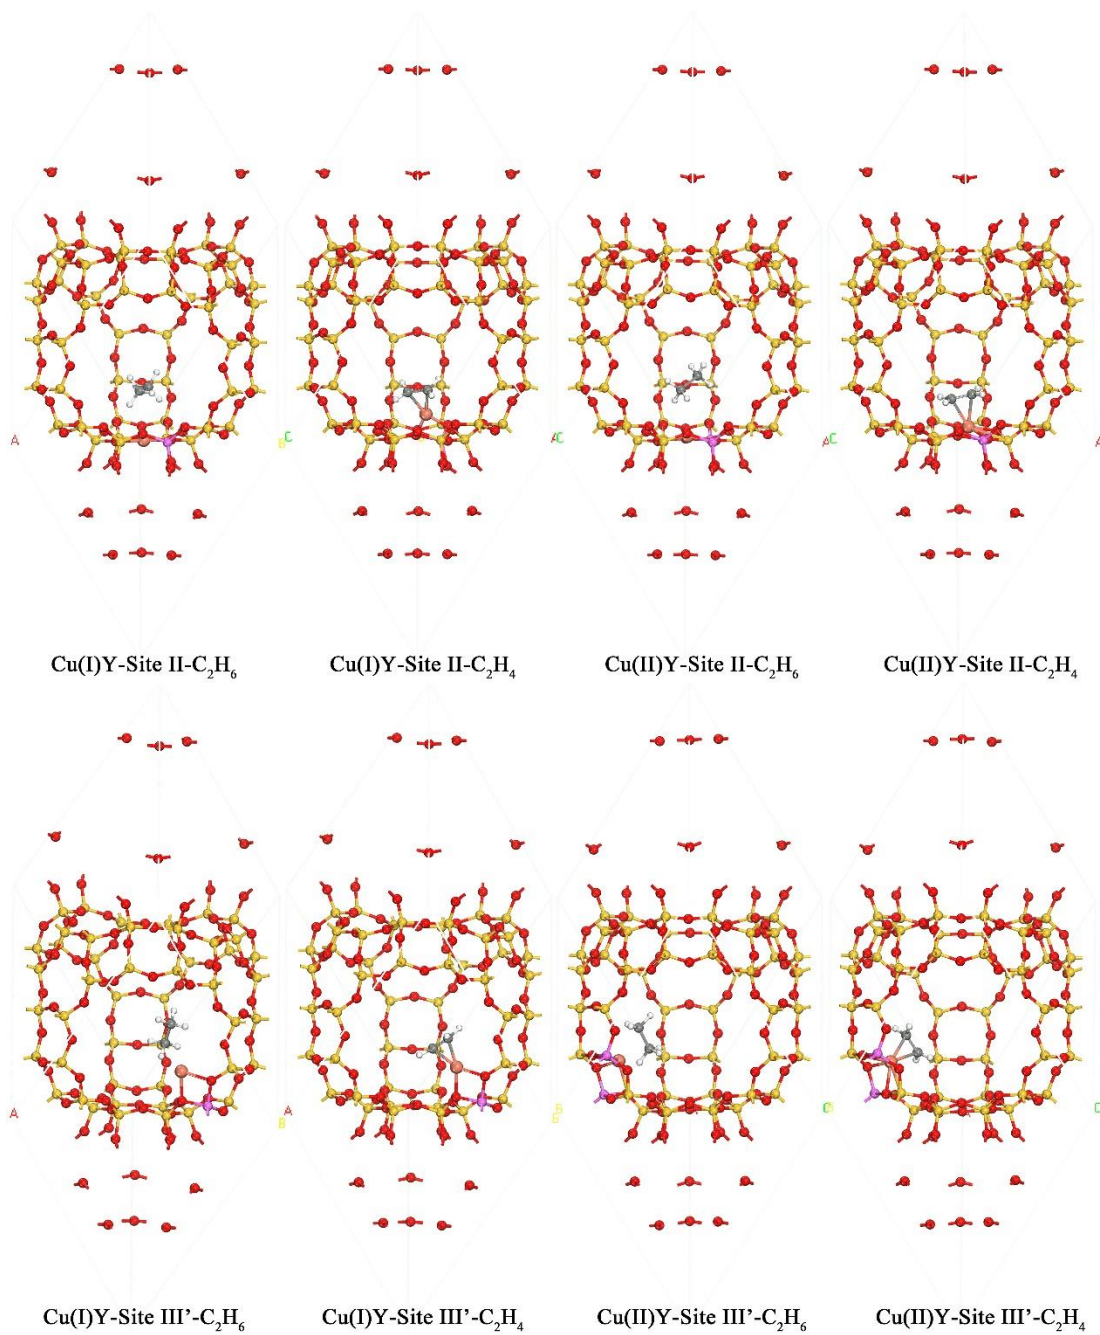

Fig. S1 The adsorption structure of ethylene and ethane with different states of Cu species on zeolites.

Tab. S1 The adsorption energy of C<sub>2</sub>H<sub>4</sub> and C<sub>2</sub>H<sub>6</sub> on Cu(I)Y, Cu(II)Y and NaY zeolite adsorbents.

| adsorption<br>energy<br>(kJ/mol) | NaY    | Cu(I)Y-Site<br>II | Cu(II)Y-<br>Site II | Cu(I)Y-Site<br>III' | Cu(II)Y-<br>Site III' |
|----------------------------------|--------|-------------------|---------------------|---------------------|-----------------------|
| C <sub>2</sub> H <sub>4</sub>    | -20.95 | -159.32           | -81.23              | -229.34             | -162.61               |
| C <sub>2</sub> H <sub>6</sub>    | -23.18 | -29.51            | -32.33              | -108.58             | -70.85                |
